# Supplementary material for: Tardiness Increases in Winter: Evidence for Annual Rhythms in Humans
Source: PubMed Central journal article supplement — J Biol Rhythms. 2019 Sep 23;34(6):672–9. doi: 10.1177/0748730419876781 (PMC6927071; doi:10.1177/0748730419876781), 2019-09-23
Supplement: SMJBR.pdf [file SMJBR.pdf]

## Supplementary Material

### Tardiness increases in winter: evidence for annual rhythms in humans

Giulia Zerbini, Vincent van der Vinne, Lana K.M. Otto, Stefanie Monecke, Thomas Kantermann, and Martha Merrow

**Table S1.** Overview of school holidays over four years.

**Figure S1.** Daily number of late arrivals around the transition from DST into standard time (Fall).

**Figure S2.** Daily number of dismissals from class around the transition from DST into standard time (Fall).

**Figure S3.** Daily number of sick leaves around the transition from DST into standard time (Fall).

**Figure S4.** Daily number of late arrivals around the transition from standard time into DST (Spring).

**Figure S5.** Daily number of dismissals from class around the transition from standard time into DST (Spring).

**Figure S6.** Daily number of sick leaves around the transition from standard time into DST (Spring).

**Table S1.** Overview of school holidays over four years.

| <b>Year</b> | <b>First school day</b> | <b>Fall holidays</b> | <b>Local holiday</b> | <b>Christmas holidays</b> | <b>Spring holidays</b> | <b>Good Friday</b> | <b>Easter Monday</b> | <b>May holidays</b> | <b>Liberation Day/ King's day</b> | <b>Ascension Weekend</b> | <b>Whit Monday</b> | <b>Summer holidays</b> |
|-------------|-------------------------|----------------------|----------------------|---------------------------|------------------------|--------------------|----------------------|---------------------|-----------------------------------|--------------------------|--------------------|------------------------|
| 2013 – 2014 | 08/26/13                | 10/21/13 – 10/25/13  | 11/11/13             | 12/23/13 – 01/03/14       | 02/24/14 – 02/28/14    | 04/18/14           | 04/21/14             | 04/22/14 – 05/02/14 | 05/05/14                          | 05/29/14 – 05/30/14      | 06/09/14           | 07/07/14 – 08/15/14    |
| 2014 – 2015 | 08/18/14                | 10/13/14 – 10/17/14  | 11/10/14             | 12/22/14 – 01/02/15       | 02/20/15 – 02/27/15    | 04/03/15           | 04/06/15 – 04/07/15  | 05/04/15 – 05/08/15 | 04/27/15                          | 05/14/15 – 05/15/15      | 05/25/15           | 07/06/15 – 08/14/15    |
| 2015 – 2016 | 08/17/15                | 10/19/15 – 10/23/15  | 11/09/15             | 12/21/15 – 01/01/16       | 02/29/16 – 03/04/16    | 03/25/16           | 03/28/16             | 04/25/16 – 05/06/16 |                                   | 05/05/15 – 05/06/16      | 05/16/16           | 07/18/16 – 08/26/16    |
| 2016 – 2017 | 08/29/16                | 10/17/16 – 10/21/16  | 11/14/16             | 12/26/16 – 01/06/17       | 02/20/17 – 02/24/17    | 04/14/17           | 04/17/17             | 04/24/17 – 05/05/17 |                                   | 05/25/17 – 05/26/17      | 06/05/17           | 07/24/17 – 09/01/17    |

## Transition from DST (Fall)

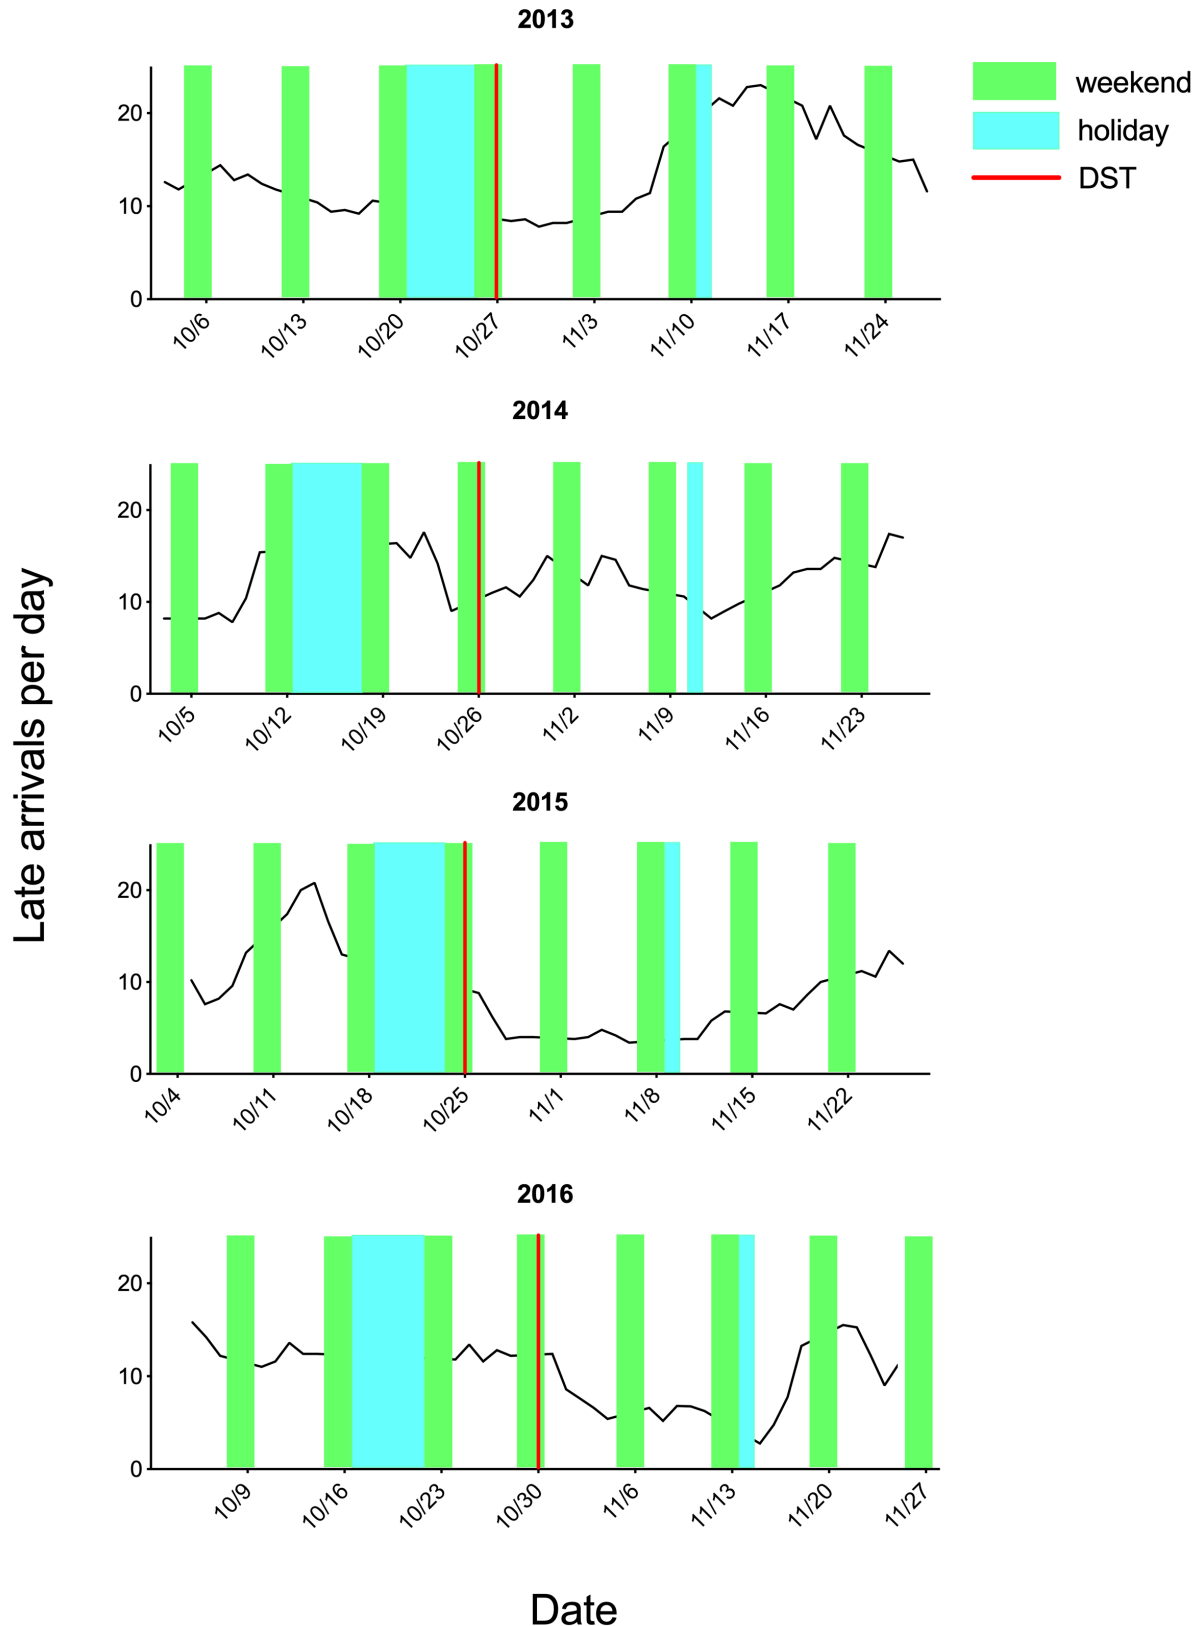

**Figure S1.** Daily number of late arrivals around the transition from DST into standard time (Fall). The daily number of late arrivals was calculated for October and November. A 5-days running average was computed for each academic year and data are plotted separately (starting from 2013-2014 on the top and finishing with 2016-2017 in the bottom). The transition from DST into standard time is indicated by a vertical red line. Weekends are indicated by green bars and holidays by light blue bars. Dates (Sundays) are reported on the x-axis.

## Transition from DST (Fall)

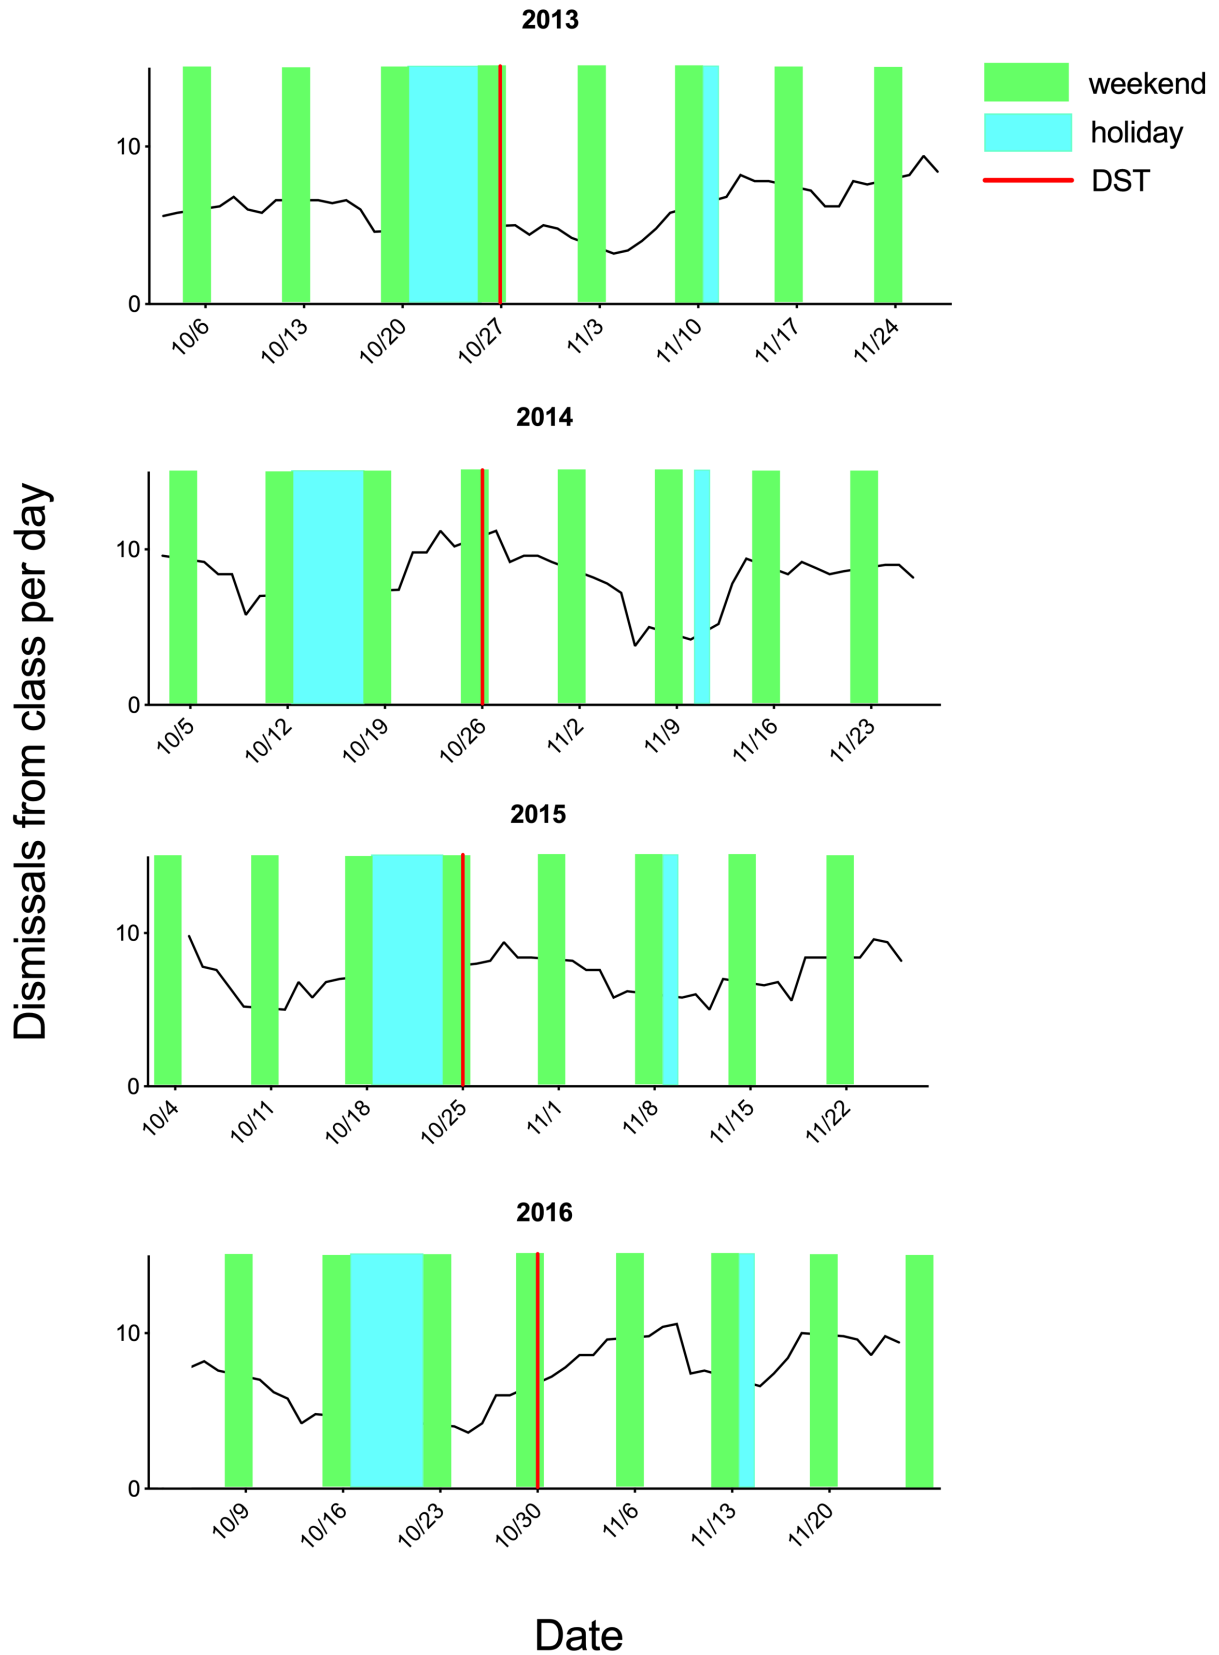

**Figure S2.** Daily number of dismissals from class around the transition from DST into standard time (Fall). The daily number of dismissals from class was calculated for October and November. For more details see the legend of Figure S1.

# Transition from DST (Fall)

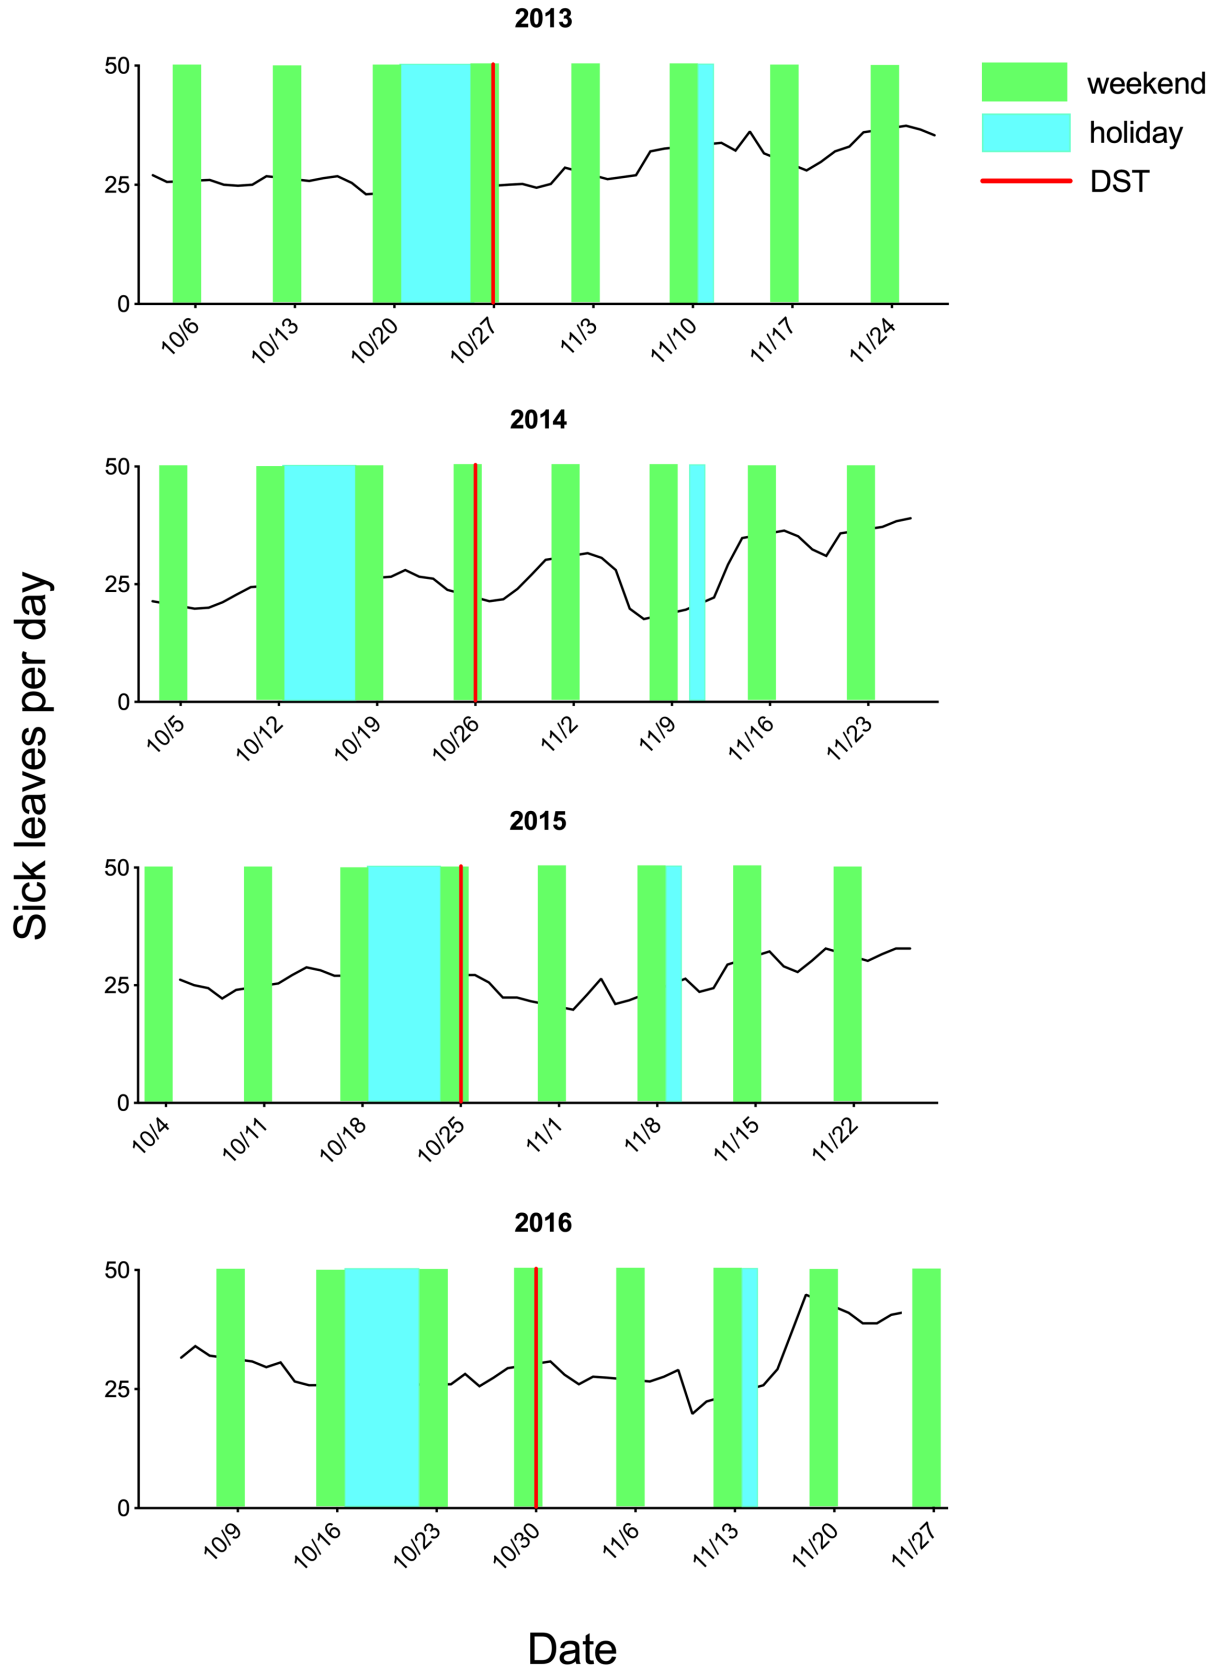

**Figure S3.** Daily number of sick leaves around the transition from DST into standard time (Fall). The daily number of sick leaves was calculated for October and November. For more details see the legend of Figure S1.

## Transition into DST (Spring)

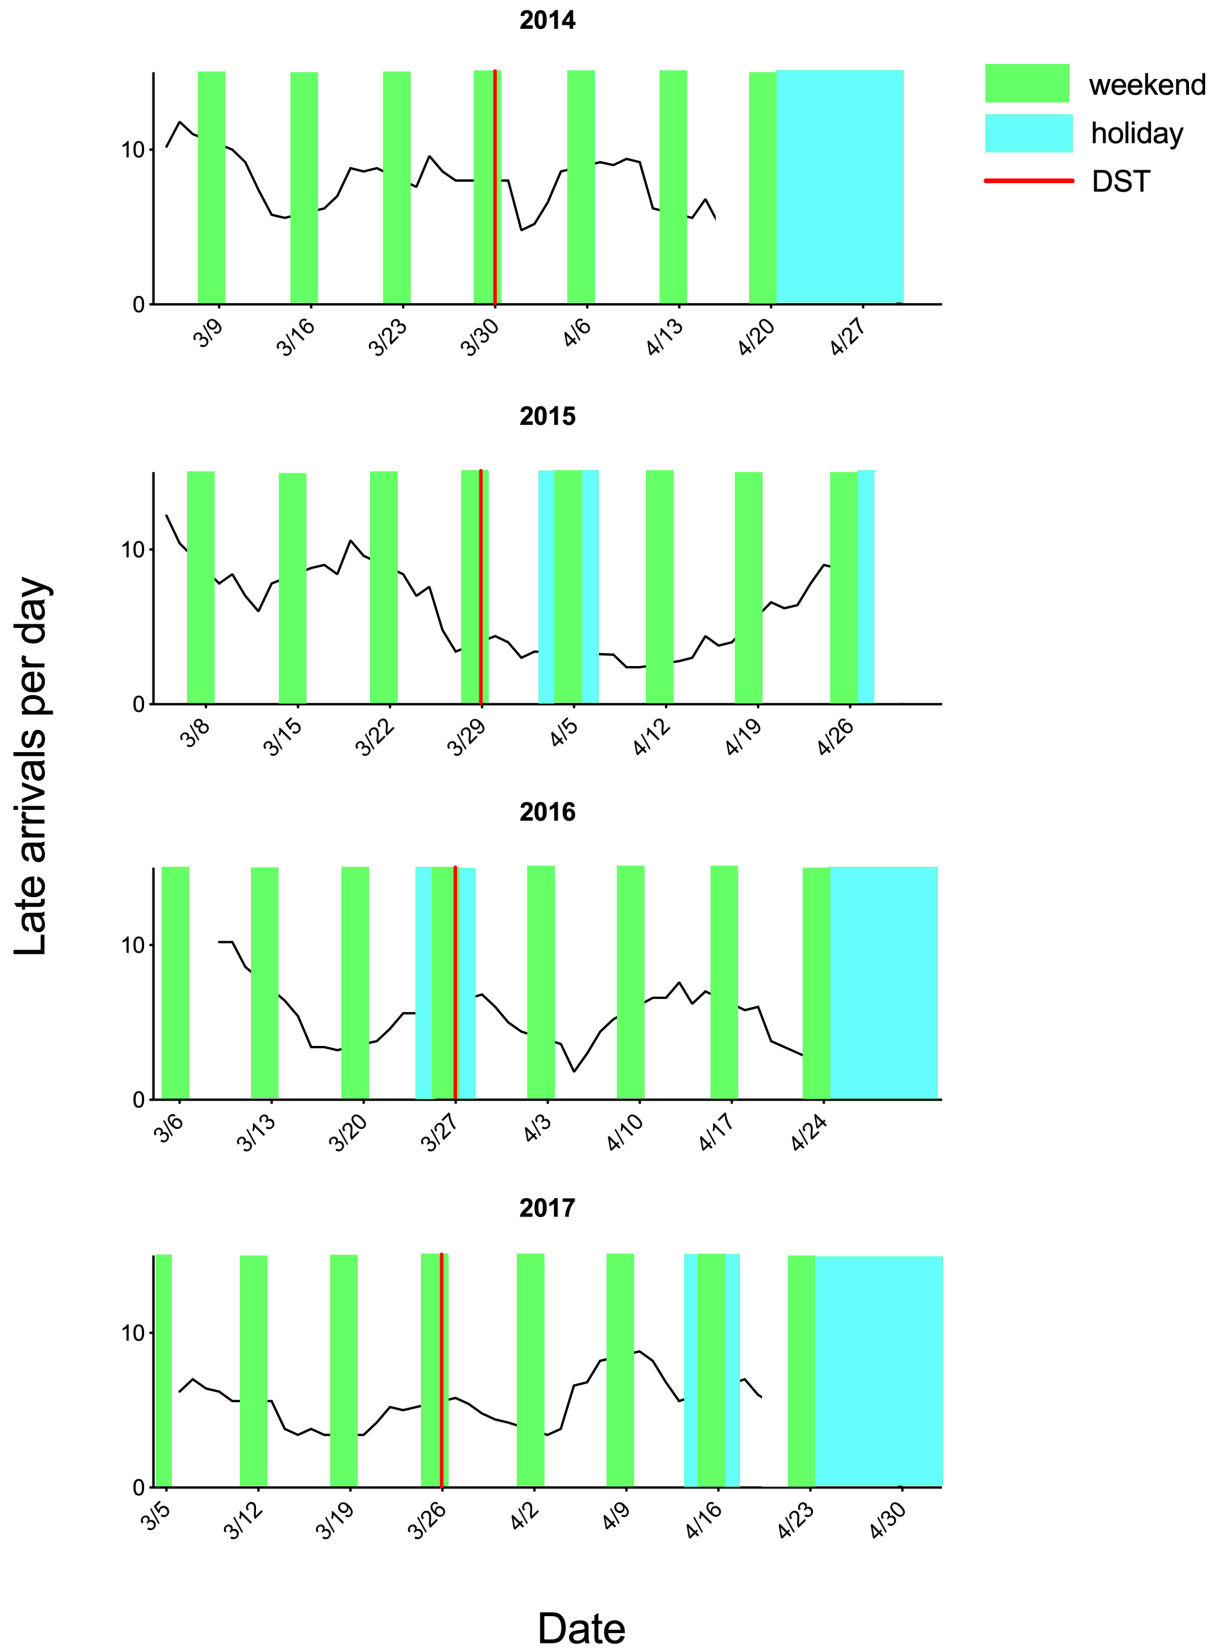

**Figure S4.** Daily number of late arrivals around the transition from standard time into DST (Spring). The daily number of late arrivals was calculated for March and April. For more details see the legend of Figure S1.

## Transition into DST (Spring)

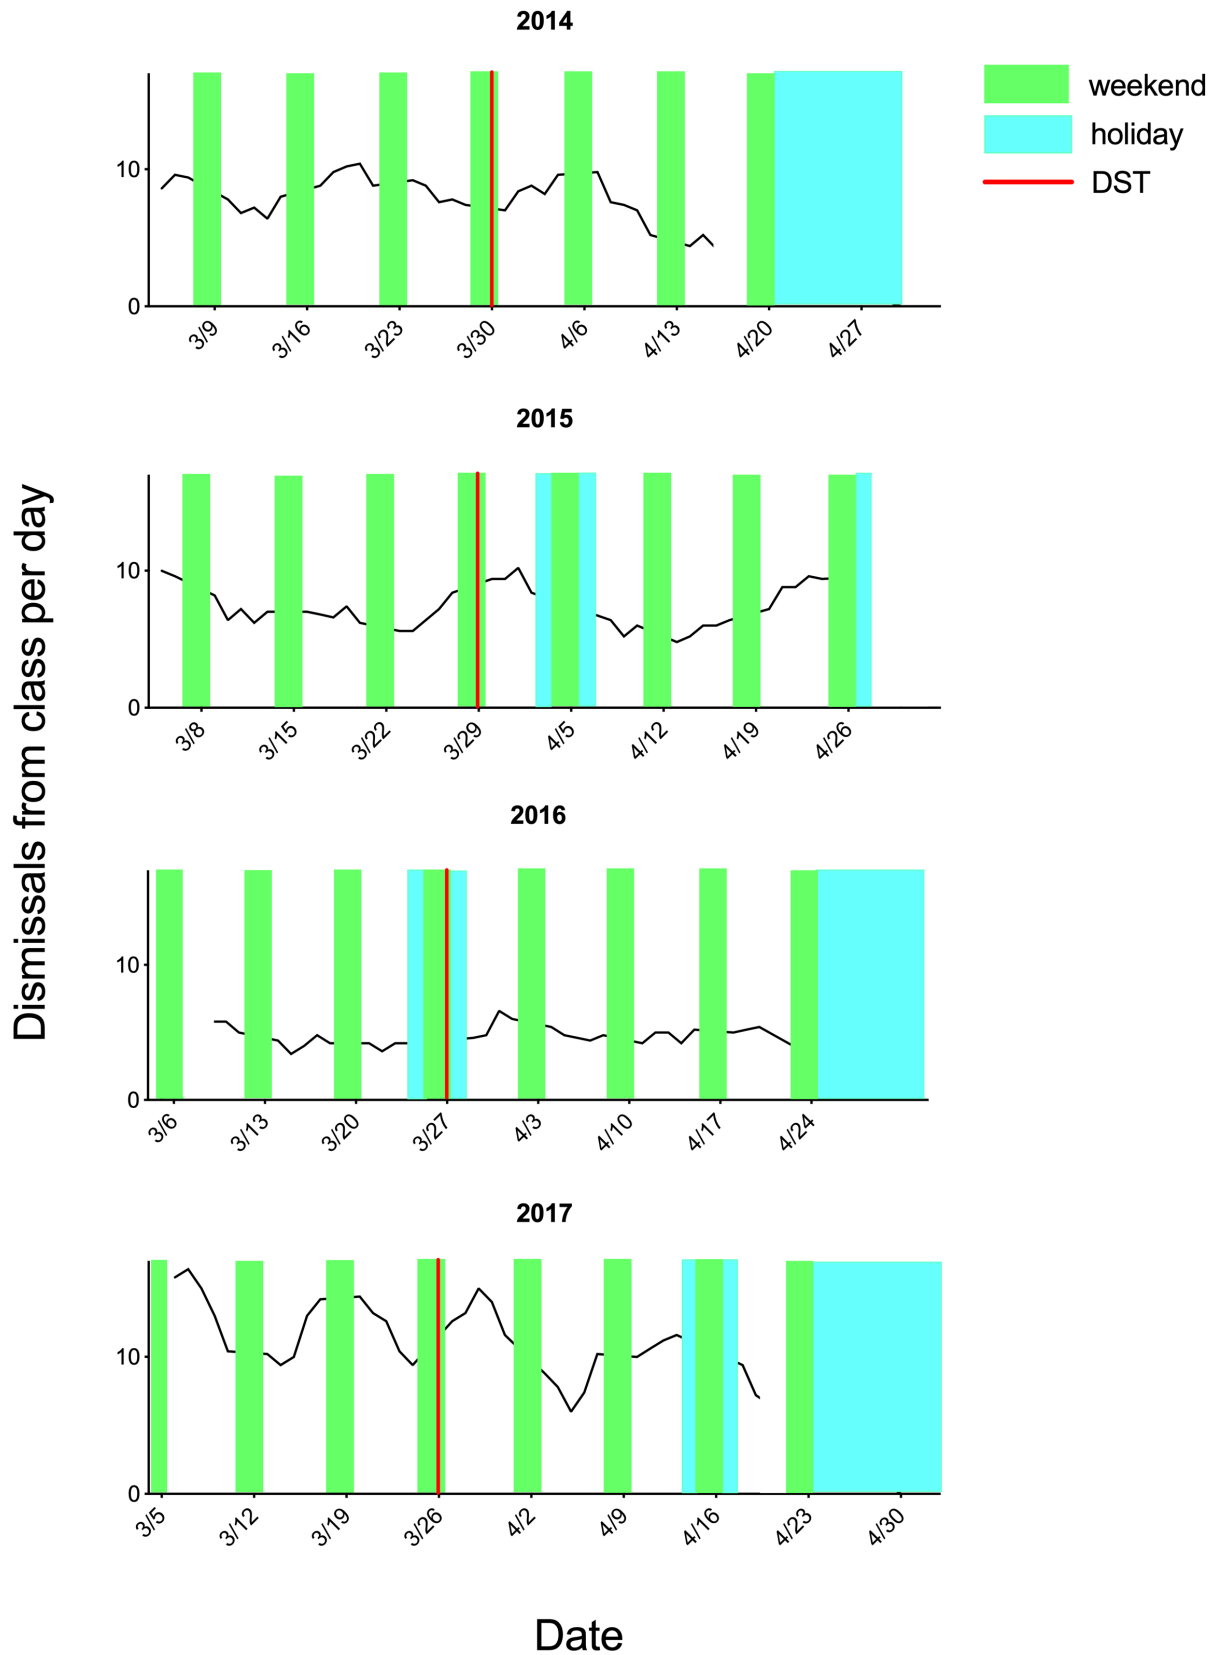

**Figure S5.** Daily number of dismissals from class around the transition from standard time into DST (Spring). The daily number of dismissals from class was calculated for March and April. For more details see the legend of Figure S1.

## Transition into DST (Spring)

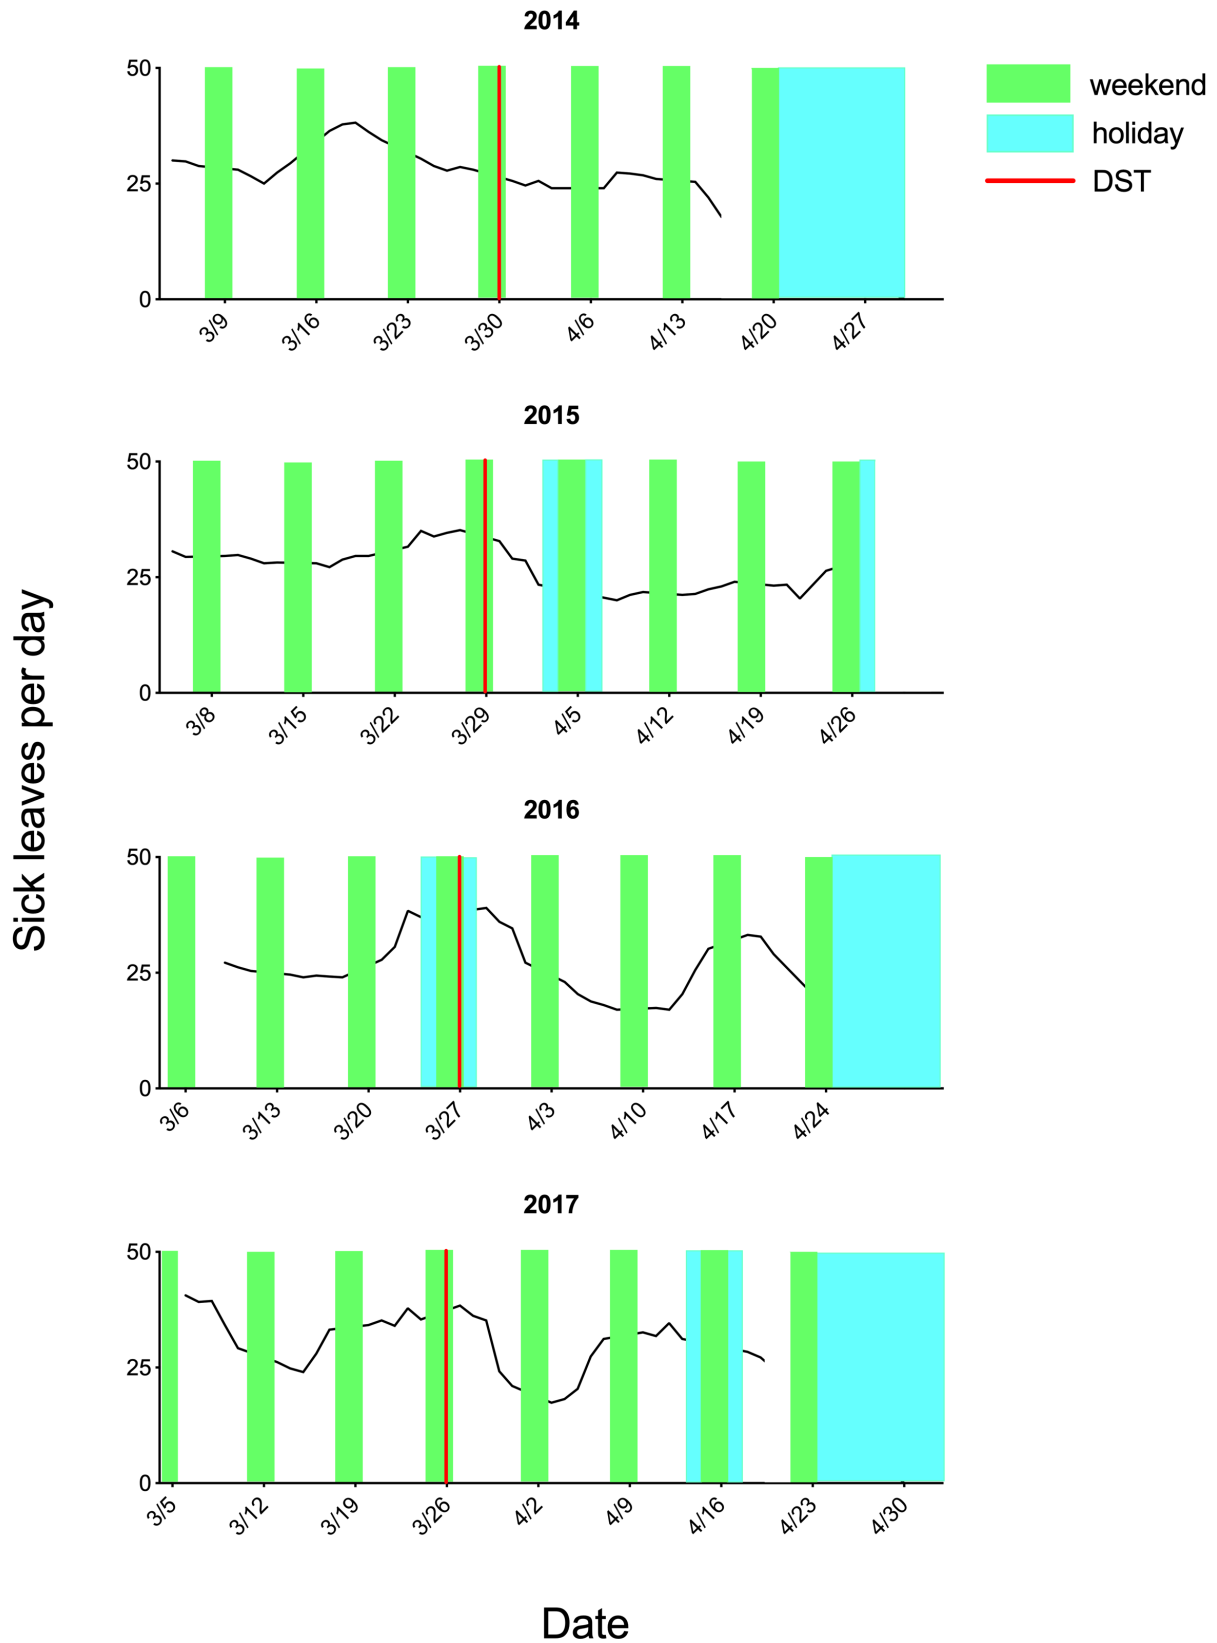

**Figure S6.** Daily number of sick leaves around the transition from standard time into DST (Spring). The daily number of sick leaves was calculated for March and April. For more details see the legend of Figure S1.
